# Supplementary material for: A wheel-shaped Zr-substituted phosphotungstate [{Zr(C2O4)2}3 (PO4)(P6W39O150)]39− with tunable proton conduction properties
Source: Royal Society of Chemistry journal article supplement (doi:10.1039/d4cc00216d), 2024-01-01
Supplement: d4cc00216d1.pdf [file d4cc00216d1.pdf]

## A Wheel-Shaped Zr-Substituted Phosphotungstate $[\{\text{Zr}(\text{C}_2\text{O}_4)_2\}_3(\text{PO}_4)(\text{P}_6\text{W}_{39}\text{O}_{150})]^{39-}$ with Tunable Proton Conduction Property

Dongsheng Yang, Lihua Liu, Yunfan Zhang, Miao Zhang, Pengtao Ma\*, Jingping Wang and Jingyang Niu\*

*Henan Key Laboratory of Polyoxometalate Chemistry, College of Chemistry and Molecular Sciences, Henan University, Kaifeng, Henan 475004, (P. R. China), Fax: (+86)-371-23886876, E-mail: mpt@henu.edu.cn, jyniu@henu.edu.cn.*

### Content:

#### Instruments and physical measurements

#### X-ray crystallography

#### Syntheses of **1**

#### Figures

**Fig. S1** Polyhedral / ball-and-stick representation of **1** from different directions.

**Fig. S2** The three planes of three  $[\text{P}_2\text{W}_{12}\text{O}_{48}]^{14-}$  fragments.

**Fig. S3** Structure profile of **1a**.

**Fig. S4** 2D layer-like framework of **1a** linked by  $\text{Na}^+$  ions.

**Fig. S5** The packing arrangement of polyanion **1a** viewed along the b axis

**Fig. S6** The packing arrangement of polyanion **1a** viewed along the c axis.

**Fig. S7** Evolution of the  $^{31}\text{P}$  NMR spectra of **1** with time in 0.1 M LiCl/D<sub>2</sub>O at ambient temperature.

**Fig. S8** The IR spectra of compound **1**.

**Fig. S9** The PXRD pattern of compound **1**.

**Fig. S10** Uv spectra of compound **1**.

**Fig. S11** TGA curve of compound **1**.

**Fig. S12** The IR spectra of **1** before and after proton conduction.

**Fig. S13** The PXRD pattern of **1** before and after proton conduction.

**Fig. S14** The PXRD pattern of compound **1** under different temperatures.

**Fig. S15** (a) and (b) Temperature-dependent proton conductivities of **1**.

**Fig. S16** (a) The proton conductivity of **1** at 368 K with 35% RH. (b) The proton conductivity of **1** at 368 K with 95% RH.

**Fig. S17** The structure of  $[\text{Zr}(\text{C}_2\text{O}_4)_4]^{4-}$  ions from the major product  $\text{K}_8[\text{Zr}(\text{C}_2\text{O}_4)_4]_2 \cdot 5\text{H}_2\text{O}$ .

#### Tables

**Table S1.** Crystallographic data of compound **1**.

**Table S2.** Bond Valence Sum (BVS) calculations of all the W, As and O atoms in **1**.

**Table S3.** The survey of other well-documented POMs-based proton conductors.

**Table S4.** Crystallographic data of the major product  $\text{K}_8[\text{Zr}(\text{C}_2\text{O}_4)_4]_2 \cdot 5\text{H}_2\text{O}$ .

#### References

## Instruments and physical measurements

All chemicals were commercially purchased and used without any further purification. The precursor  $K_{12}[H_2P_2W_{12}O_{48}] \cdot 24H_2O$  was prepared according to the document and confirmed by IR spectrum. IR spectra were performed using a Bruker VERTEX-70 spectrometer using KBr pellets in the region of 500–4000  $cm^{-1}$ . A Bruker D8 ADVANCE apparatus with Cu K $\alpha$  radiation at 293 K gave birth to the experimental PXRD patterns. TGA curves were recorded from room 25 °C to 1000 °C with a heating rate of 10 °C  $min^{-1}$  in flowing  $N_2$  atmosphere on a NETZSCHSTA449F5 Jupiter thermal analyzer. Elemental analyses (C, H, N) were conducted on an Elementar Vario MICRO analyzer. Elemental analysis for P, W, Zr, K and Na were performed with a PerkinElmer Optima 2100 DV inductively coupled plasma optical emission spectrometer. Diffuse reflectance spectra were collected at room temperature on a finely ground sample with a HITACHI U-4500UV-Vis-NIR spectrometer equipped with a 60 mm diameter integrating sphere. The solution  $^{31}P$  NMR spectra were detected in 5 mm tubes with  $^1H$  decoupling on a Bruker AVANCE NEO 500 MHz NMR spectrometer operating at 500 MHz.

## X-ray crystallography

The single crystal of **1** was directly fixed on a loop and kept at 150 K during data collection on a Bruker D8 VENTURE PHOTON II CCD diffractometer with Mo K $\alpha$  radiation ( $\lambda = 0.71073 \text{ \AA}$ ). After the data reduction, Olex2 was applied to analyze the structures, by which it was first solved with the ShelXT structure solution program by the utilization of direct methods and then refined with the ShelXL-2018/3 refinement package using least squares minimisation.<sup>S1,S2</sup> In the final refinement, all the non-hydrogen atoms were refined anisotropically.<sup>S3</sup> In addition, all the atoms are refined anisotropically in the final refinement cycle, only few harsh constraints have been used in order to eliminate the ADP and/or NDP alerts. And some lattice water molecules were located by Fourier map, whereas the rest lattice molecules were determined by TGA results and element analyses. All H atoms on water molecules in the molecular formula were directly included. Crystallographic data of **1** has been deposited in the Cambridge Crystallographic Data Center with CCDC numbers: 2294441.

## Preparation of the $[N(CH_3)_4]_2K_{16}Na_{10.5}H_{10.5}\{[Zr(C_2O_4)_2]_3(PO_4)(P_6W_{39}O_{150})\} \cdot 45H_2O$

$ZrOCl_2 \cdot 8H_2O$  (0.16 g, 0.50 mmol), oxalic acid (0.26 g, 2.00 mmol) were dissolved in 20.00 mL of distilled water upon stirring. Being stirred for around 30 min, the mixture was added in  $K_{12}[H_2P_2W_{12}O_{48}] \cdot 24H_2O$  (0.48 g, 0.10 mmol). The pH value of the mixture was adjusted to 4.0 by 3 mol·L $^{-1}$  KOH. Eventually, this solution was stirred and heated to 90 °C for 2h and then filtered. The slow evaporation of the filtrate resulted in colorless block crystals after about four days. Yield: 16.9% (0.064 g, based on  $K_{12}[H_2P_2W_{12}O_{48}] \cdot 24H_2O$ ). Elemental analysis (%) calcd. for (**1**): C, 1.92; H, 1.01; N, 0.22; K, 4.98; Na, 1.92; P, 1.73; W, 57.11; Zr, 2.18. Found: C, 1.96; H, 1.06; N, 0.25; K, 4.71; Na, 2.07; P, 1.85; W, 60.55; Zr, 2.37. After about ten days, a mass of large colorless block crystals  $K_8[Zr(C_2O_4)_4]_2 \cdot 5H_2O$  were obtained, which are confirmed by X-ray single

crystal diffraction (Fig. S17 and Table S4).

## Figures

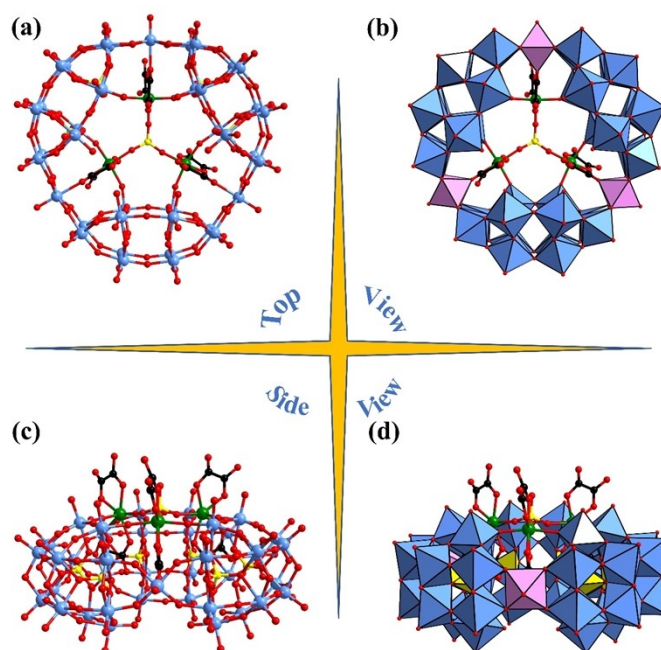

**Fig. S1** Polyhedral / ball-and-stick representation of **1a** in different directions.

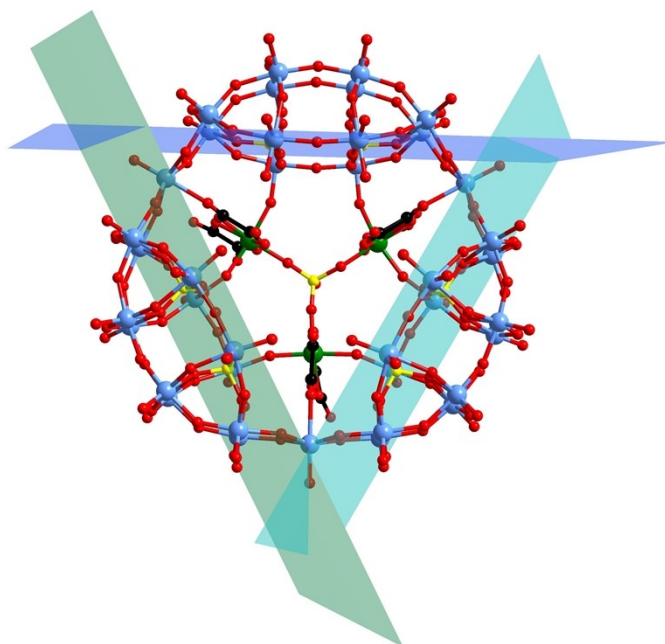

**Fig. S2** The three planes of three  $[P_2W_{12}O_{48}]^{14-}$  fragments.

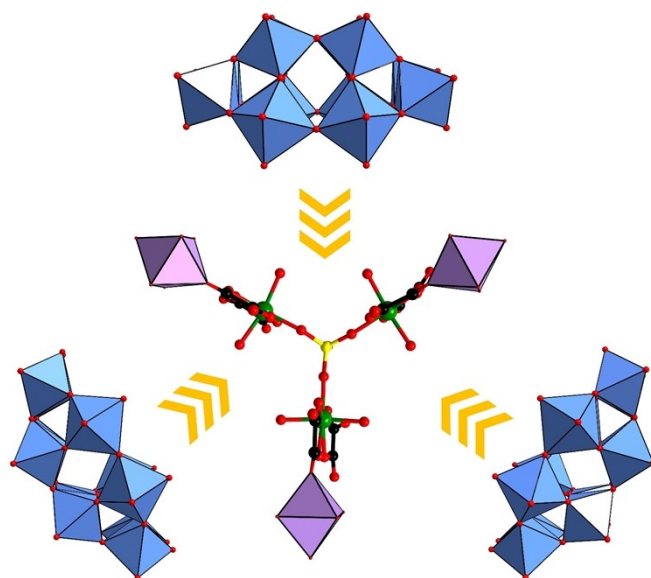

**Fig. S3** Structure profile of **1a**.

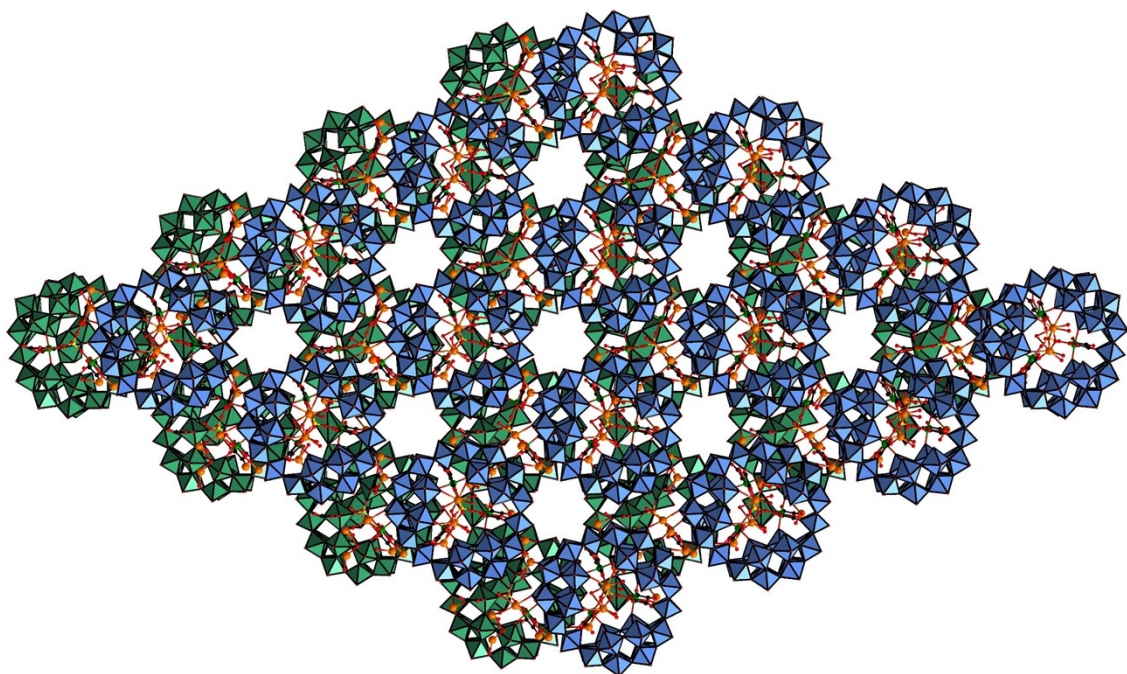

**Fig. S4** 2D layer-like framework of **1a** linked by Na<sup>+</sup> ions.



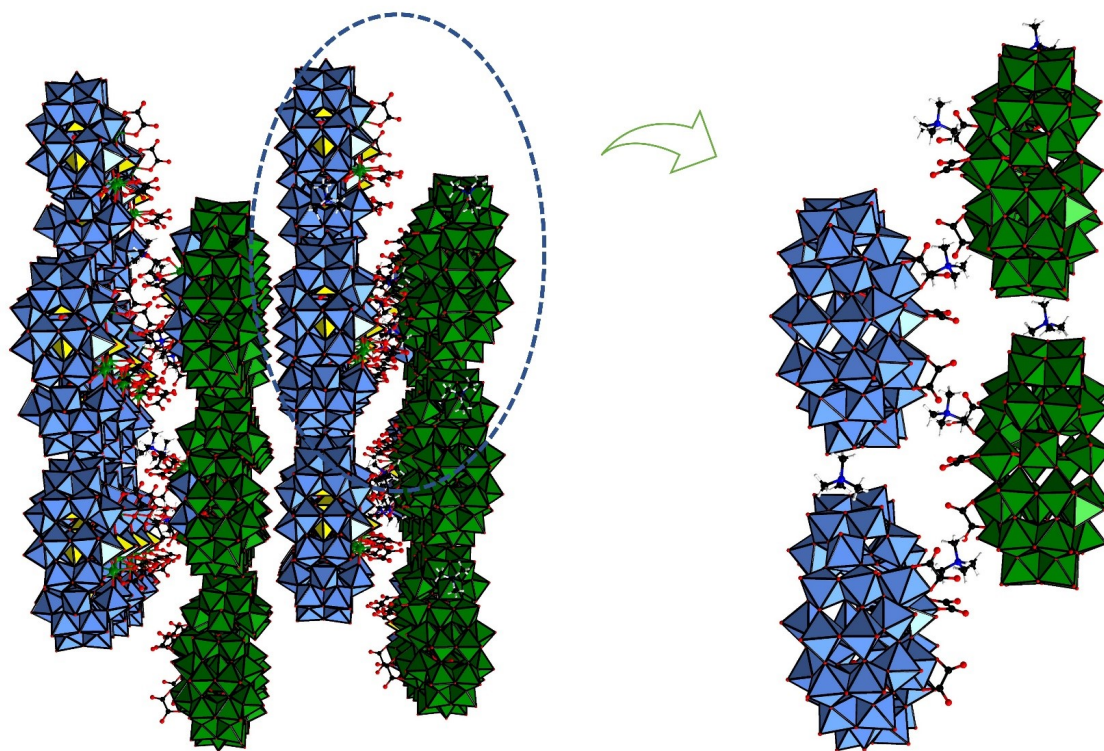

**Fig. S5** The packing arrangement of polyanion **1a** viewed along the *b* axis.

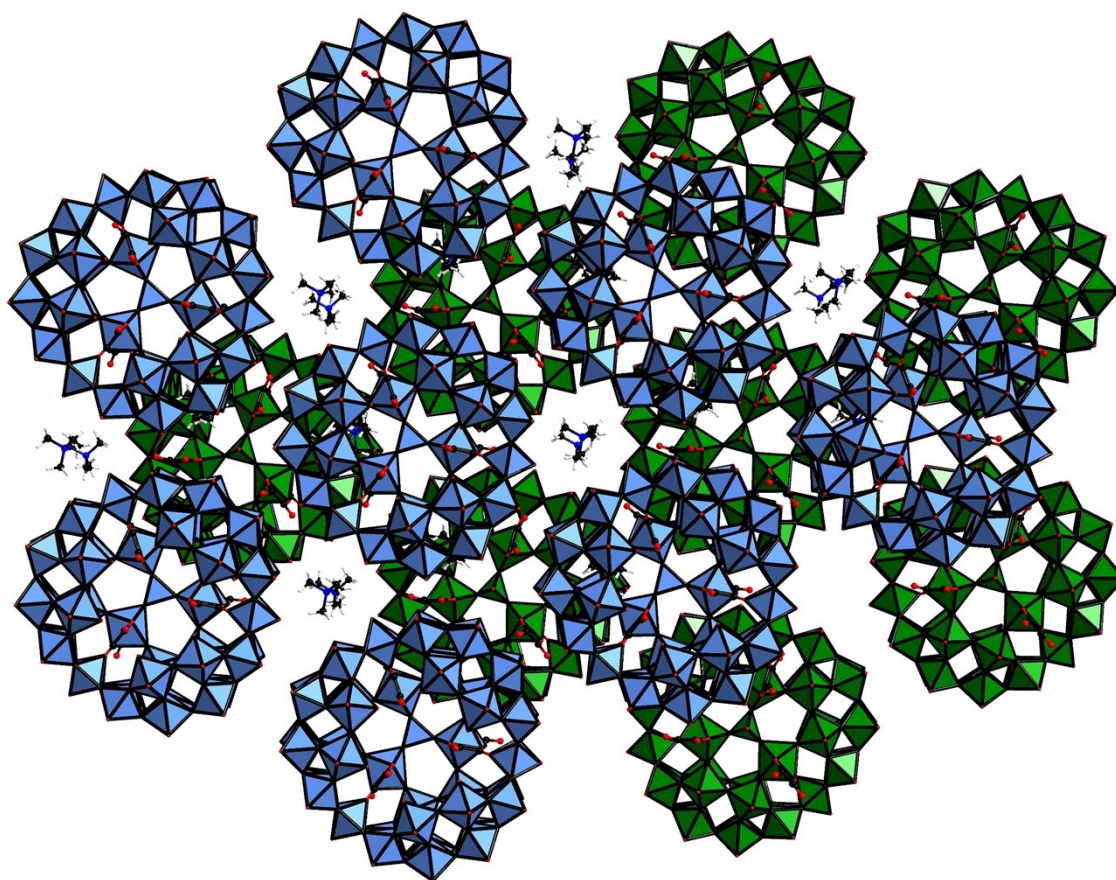

**Fig. S6** The packing arrangement of polyanion **1a** viewed along the *c* axis.

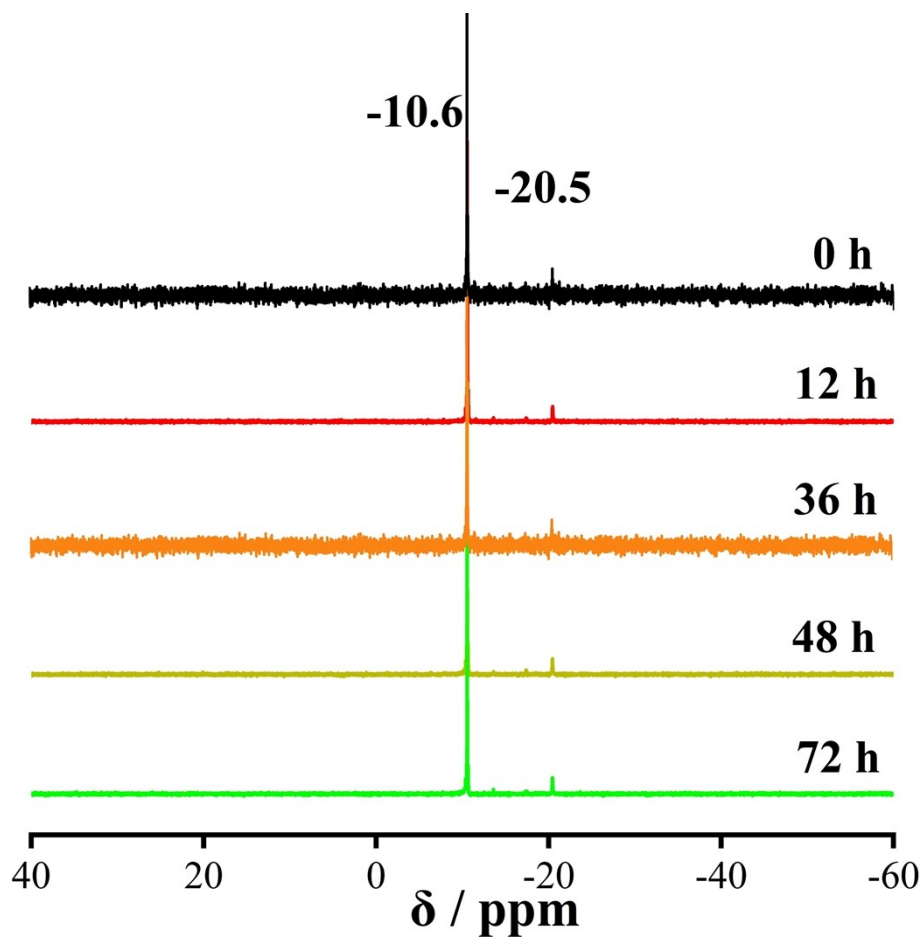

**Fig. S7** Evolution of the  $^{31}\text{P}$  NMR spectra of **1** with time in 0.1 M LiCl/D<sub>2</sub>O at ambient temperature.

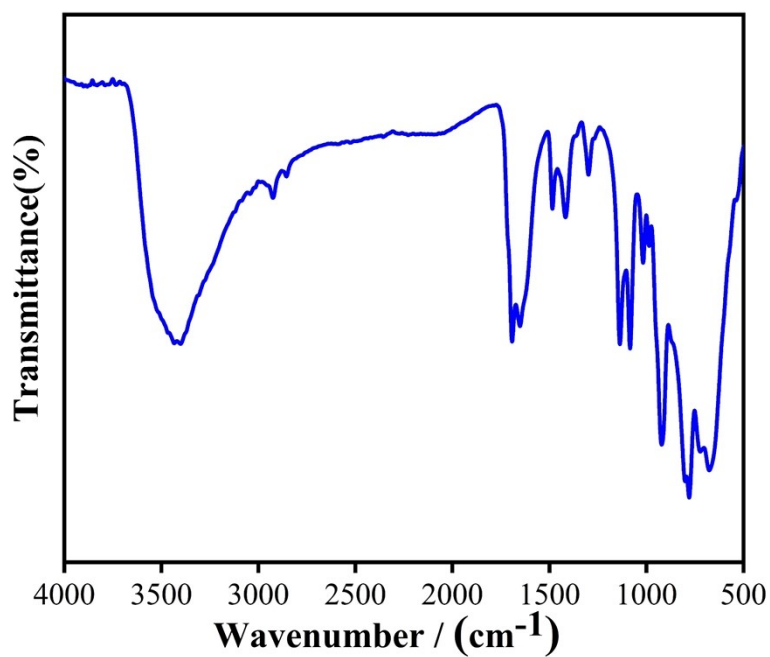

**Fig. S8** The IR spectra of compound **1**.

IR spectra have been measured. As we can see, the typical vibration bands of  $[\text{H}_2\text{P}_2\text{W}_{12}\text{O}_{48}]^{12-}$  subunits appear in the region of  $700\text{--}1200\text{ cm}^{-1}$ , where the peaks appearing at  $1139$ ,  $1084$ ,  $1017\text{ cm}^{-1}$  are attributed to the vibration of P–O. The bands located in the low-wavenumber region are attributable to  $\nu(\text{W-O}_t)$ ,  $\nu(\text{W-O}_b)$  and  $\nu(\text{W-O}_c)$  around  $989$ ,  $929$ ,  $804$  and  $780\text{ cm}^{-1}$ , respectively.<sup>54</sup> For the coordination modes of the carboxylate group, the difference between the asymmetric ( $\nu_{as}$ ) and symmetric ( $\nu_s$ ) carboxylate stretches is often used.<sup>55</sup> Strong absorption bands at  $1693$  and  $1650$  can be regarded as asymmetric stretching vibration carboxylate group from the oxalate groups, whereas the peak  $1362\text{ cm}^{-1}$  can be regarded as symmetric stretching vibrations of the oxalate groups.<sup>56–8</sup> In addition, a weak band  $1084\text{ cm}^{-1}$  and the band appearing at  $1417\text{ cm}^{-1}$  are attributed to the vibration of  $\nu(\text{C-H})$  and  $\nu(\text{C-N})$  which prove the presence of organic ligand components. In the high-wavenumber region, the bands at  $3400\text{ cm}^{-1}$  and  $3041\text{ cm}^{-1}$  are assigned to the stretching vibrations of  $\nu(\text{O-H})$  and  $\nu(\text{C-H})$ .

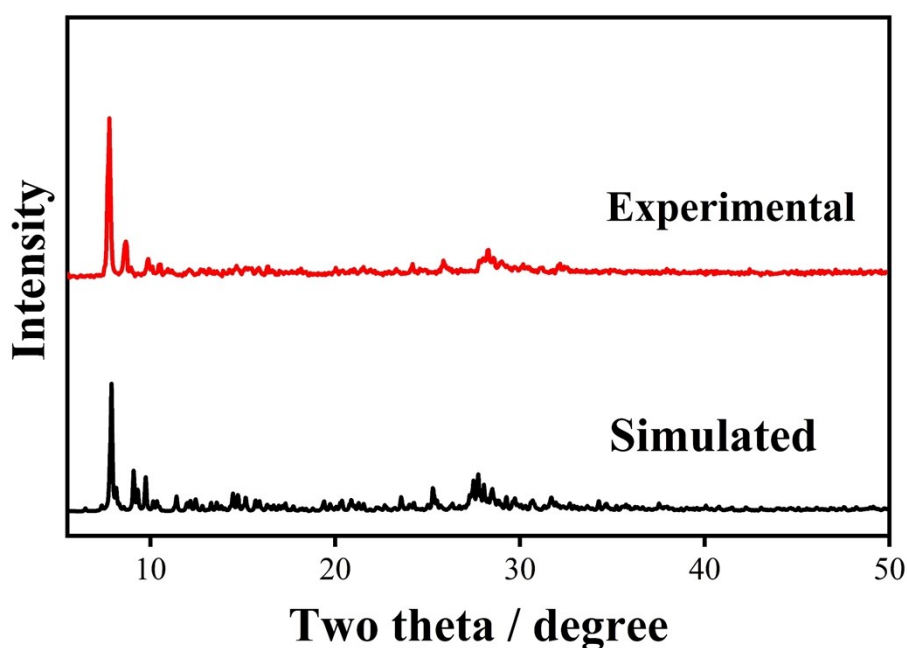

**Fig. S9** The PXRD pattern of compound 1.



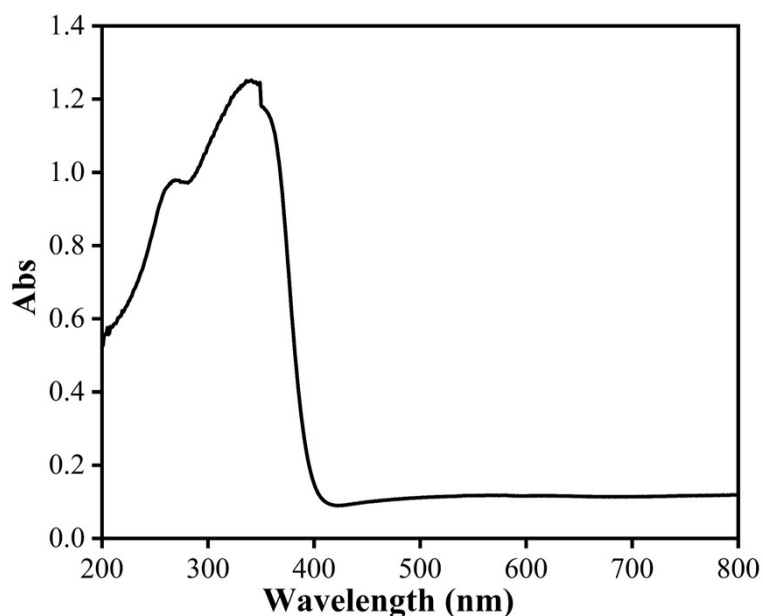

**Fig. S10** UV spectra of compound **1**.

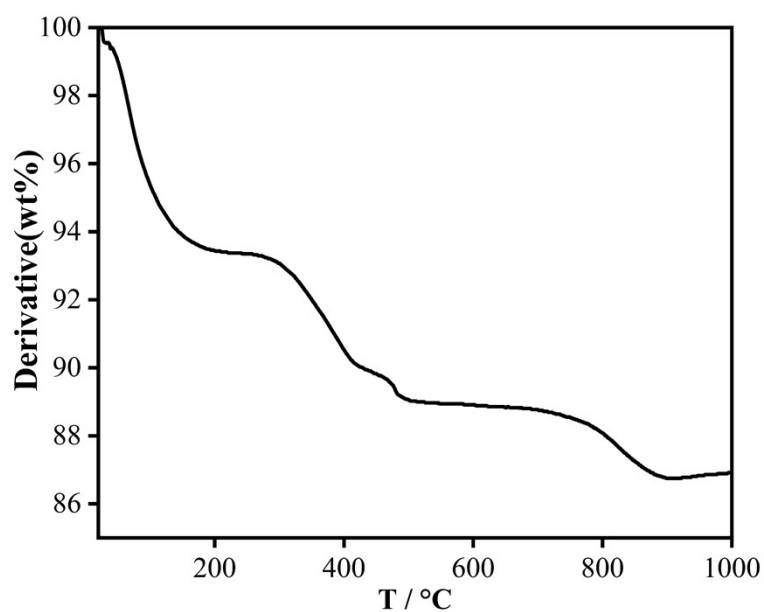

**Fig. S11** TGA curve of compound **1**.

**TGA analysis.** The TG behaviors of **1** was measured utilizing crystalline samples under nitrogen atmosphere of 25 to 1000 °C. The TG curve of **1** exhibits three weight-loss steps. The first weight loss of 6.57% (calcd. 6.49 %) for **1** in the temperature range from 25 to 200 °C are attributed to the release of forty-five lattice water molecules. The second weight loss of 4.53% (calcd 4.45%) for **1** in the temperature range from 200 to 600 °C correspond to the removal of six oxalates. The third weight loss for **1** in the temperature after 700 °C is assigned to the loss of the  $[N(CH_3)_4]^+$  cations, structural water molecules, accompanied with the collapse of the POM skeleton of **1**.

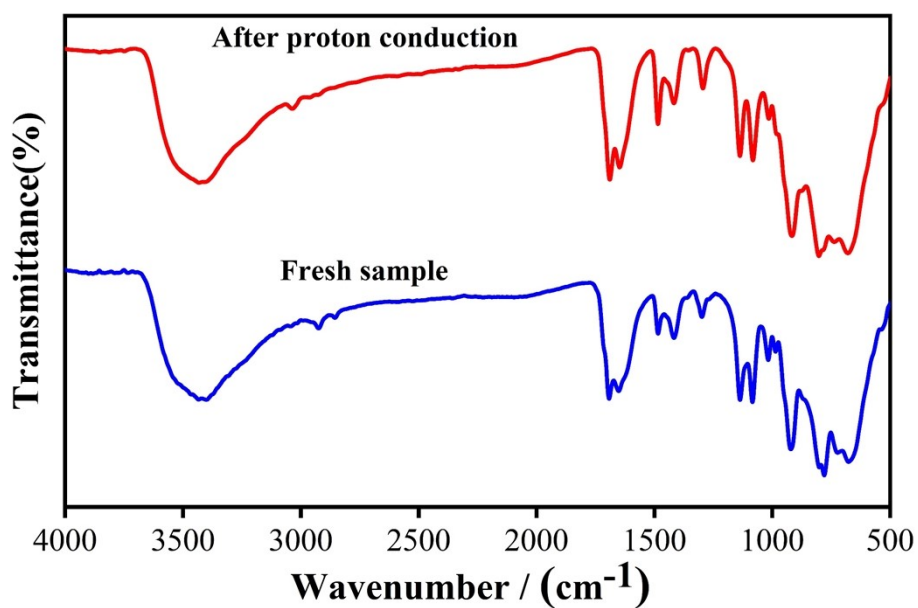

Fig. S12 The IR spectra of **1** before and after proton conduction.

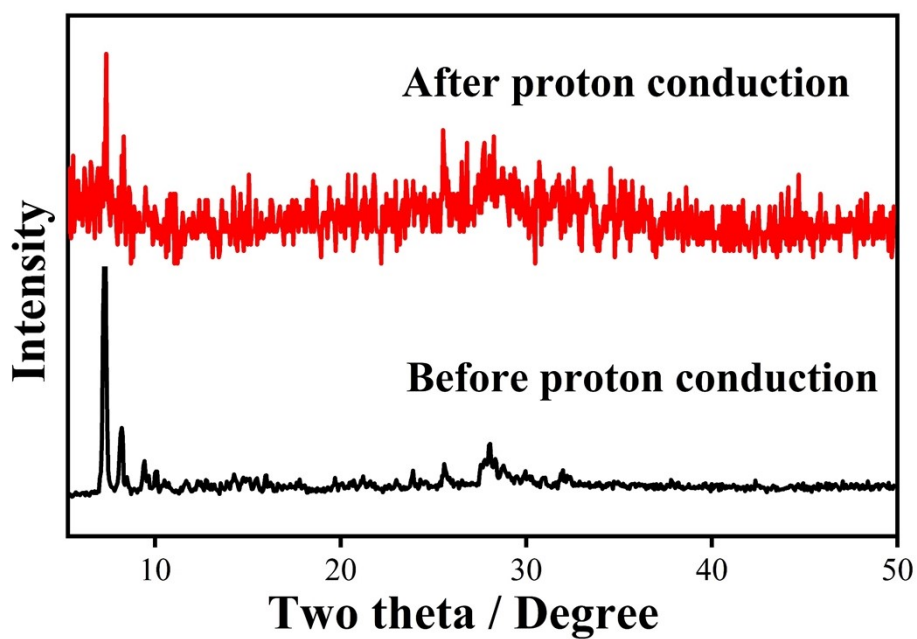

Fig. S13 The PXRD pattern of **1** before and after proton conduction.

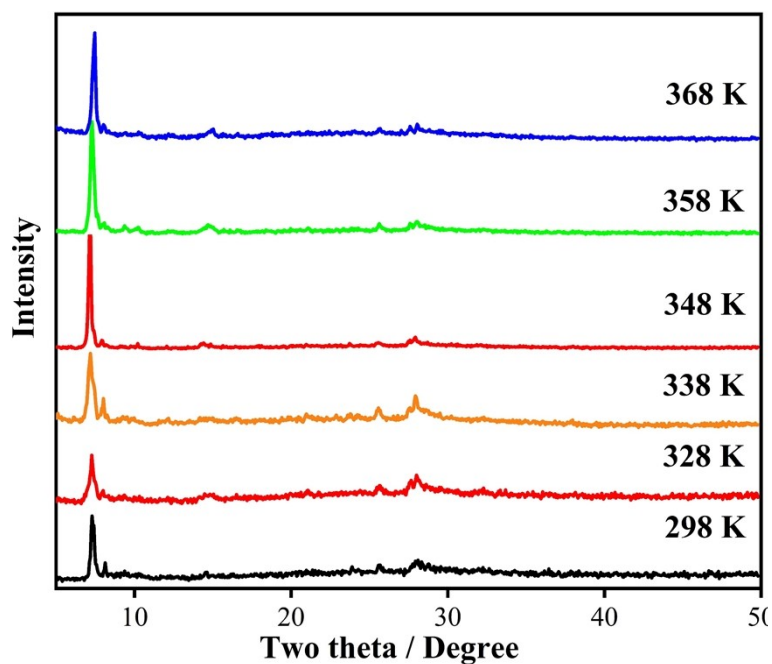

**Fig. S14** The PXRD pattern of compound **1** under different temperatures.

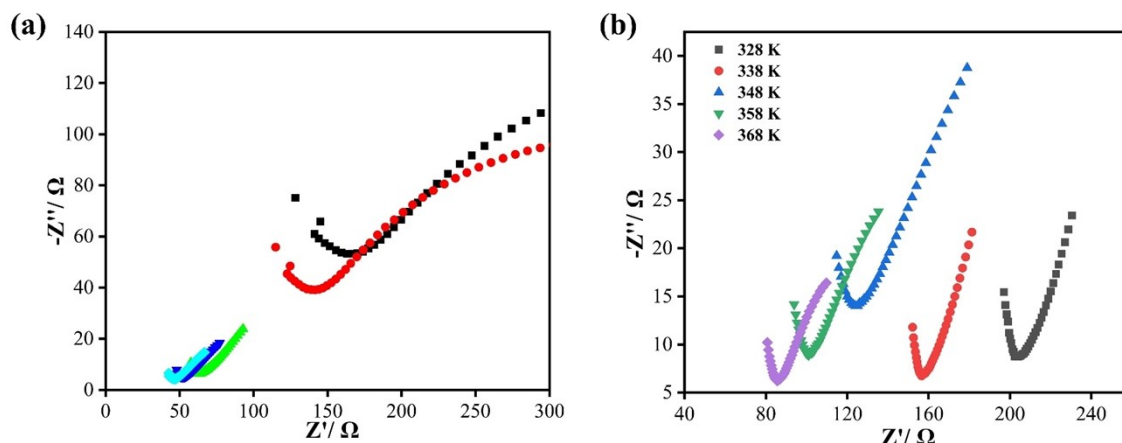

**Fig. S15** (a) and (b) Temperature-dependent proton conductivities of **1**.

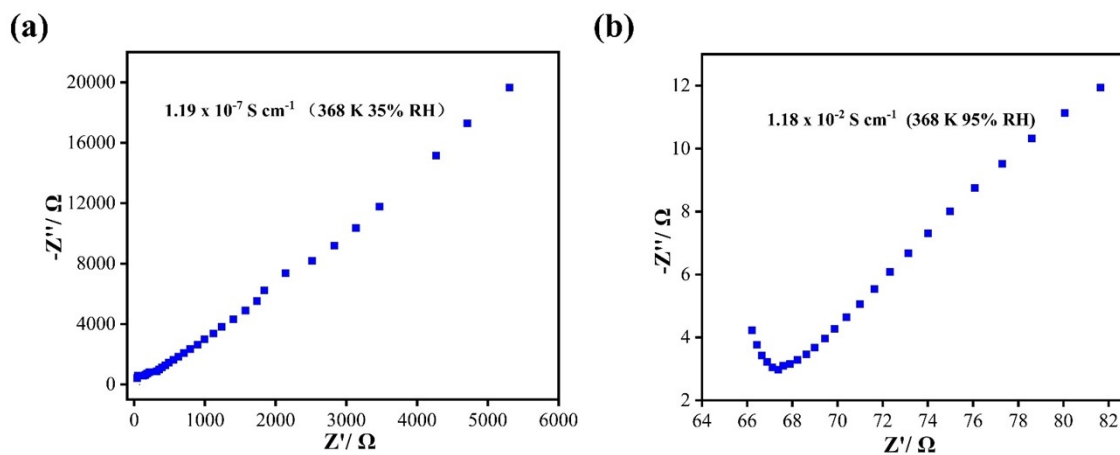

**Fig. S16** (a) The proton conductivity of **1** at 368 K with 35% RH. (b) The proton conductivity of **1** at 368 K with 95% RH.

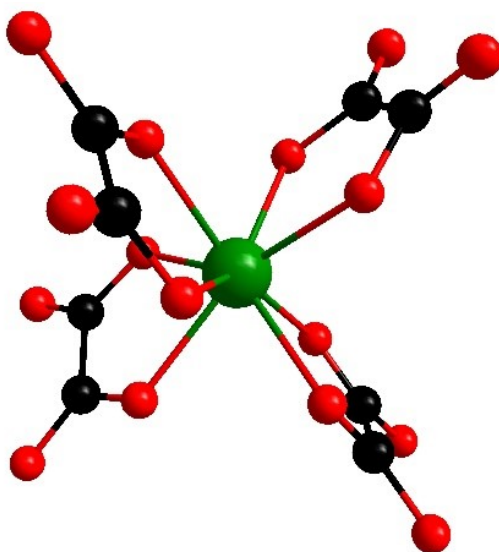

**Fig. S17** The structure of  $[\text{Zr}(\text{C}_2\text{O}_4)_4]^{4-}$  ions from the major product  $\text{K}_8[\text{Zr}(\text{C}_2\text{O}_4)_4]_2 \cdot 5\text{H}_2\text{O}$ .

## Tables

**Table S1.** Crystallographic data of compound **1**.

|                                              | <b>1</b>                                                                                                            |
|----------------------------------------------|---------------------------------------------------------------------------------------------------------------------|
| Empirical formula                            | $\text{C}_{20}\text{H}_{38}\text{K}_{16}\text{N}_2\text{Na}_{10.5}\text{O}_{218}\text{P}_7\text{W}_{39}\text{Zr}_3$ |
| Formula weight                               | 12321.61                                                                                                            |
| Temperature / K                              | 150                                                                                                                 |
| Crystal system                               | trigonal                                                                                                            |
| Space group                                  | $P3_121$                                                                                                            |
| $a[\text{\AA}]$                              | 22.6518(5)                                                                                                          |
| $b[\text{\AA}]$                              | 22.6518(5)                                                                                                          |
| $c[\text{\AA}]$                              | 75.9558(19)                                                                                                         |
| $\alpha[\text{\AA}]$                         | 90                                                                                                                  |
| $\beta[\text{\AA}]$                          | 90                                                                                                                  |
| $\gamma[\text{\AA}]$                         | 120                                                                                                                 |
| $V[\text{\AA}^3]$                            | 33751.8(17)                                                                                                         |
| $Z$                                          | 6                                                                                                                   |
| $\rho^{\text{calcd}} [\text{g}/\text{cm}^3]$ | 3.600                                                                                                               |
| $\mu [\text{mm}^{-1}]$                       | 20.458                                                                                                              |
| $F(000)$                                     | 32259.0                                                                                                             |

|                                   |                                                               |
|-----------------------------------|---------------------------------------------------------------|
| Index ranges                      | -27 ≤ h ≤ 26, -27 ≤ k ≤ 26, -90 ≤ l ≤ 90                      |
| Reflections collected             | 186155                                                        |
| Independent reflections           | 39932 [ $R_{\text{int}}=0.0502$ , $R_{\text{sigma}}=0.0425$ ] |
| data/restraints/parameters        | 39932/299/2787                                                |
| Goodness-of-fit on $F^2$          | 1.138                                                         |
| $R1$ , $wR2$ [ $I > 2\sigma(I)$ ] | 0.0399, 0.0907                                                |
| $R1$ , $wR2$ [all data]           | 0.0418, 0.0916                                                |

**Table S2.** Bond Valence Sum (BVS) calculations of all the W, P and O atoms in **1**.

| Atoms | BVS value | Atoms | BVS value | Atoms | BVS value |
|-------|-----------|-------|-----------|-------|-----------|
| W1    | 6.153     | W31   | 6.512     | O22   | 2.070     |
| W2    | 6.325     | W32   | 6.202     | O23   | 1.802     |
| W3    | 6.188     | W33   | 6.206     | O24   | 1.914     |
| W4    | 6.159     | W34   | 6.220     | O25   | 1.915     |
| W5    | 6.161     | W35   | 6.140     | O26   | 1.901     |
| W6    | 6.132     | W36   | 6.392     | O27   | 1.904     |
| W7    | 6.175     | W37   | 6.228     | O28   | 1.994     |
| W8    | 5.917     | W38   | 5.963     | O29   | 1.862     |
| W9    | 5.983     | W39   | 6.358     | O30   | 1.570     |
| W10   | 6.207     | O1    | 1.830     | O31   | 2.045     |
| W11   | 6.120     | O2    | 1.780     | O32   | 2.174     |
| W12   | 6.007     | O3    | 2.270     | O33   | 1.994     |
| W13   | 6.317     | O4    | 2.437     | O34   | 1.827     |
| W14   | 6.451     | O5    | 1.782     | O35   | 2.322     |
| W15   | 6.363     | O6    | 1.779     | O36   | 1.708     |
| W16   | 6.333     | O7    | 2.123     | O37   | 2.127     |
| W17   | 6.065     | O8    | 2.039     | O38   | 1.938     |
| W18   | 6.181     | O9    | 2.049     | O39   | 2.053     |
| W19   | 6.372     | O10   | 2.189     | O40   | 1.960     |
| W20   | 6.022     | O11   | 1.754     | Zr1   | 3.683     |
| W21   | 6.148     | O12   | 1.769     | Zr2   | 3.725     |
| W22   | 6.078     | O13   | 1.886     | Zr3   | 3.748     |
| W23   | 6.133     | O14   | 1.807     | P1    | 4.749     |
| W24   | 6.254     | O15   | 1.157     | P2    | 4.760     |
| W25   | 6.222     | O16   | 1.893     | P3    | 4.857     |
| W26   | 6.131     | O17   | 2.089     | P4    | 4.741     |
| W27   | 6.319     | O18   | 2.041     | P5    | 4.704     |
| W28   | 6.421     | O19   | 1.998     | P6    | 4.648     |
| W29   | 6.025     | O20   | 1.859     | P7    | 4.934     |
| W30   | 6.305     | O21   | 1.694     |       |           |



**Table S3.** The survey of other well-documented POMs-based proton conductors.

| Compounds                                                                                                                                                                                                                                                                     | Conductivity<br>(S cm <sup>-1</sup> ) | Temperature<br>(K) | Relative<br>humidity (%) | Refs.            |
|-------------------------------------------------------------------------------------------------------------------------------------------------------------------------------------------------------------------------------------------------------------------------------|---------------------------------------|--------------------|--------------------------|------------------|
| [Ni <sub>8</sub> (OH) <sub>4</sub> (H <sub>2</sub> O) <sub>2</sub> (BDPCOOH) <sub>6</sub> ]                                                                                                                                                                                   | 2.22 × 10 <sup>-3</sup>               | 353                | 100                      | S9               |
| [Cu(en) <sub>2</sub> (H <sub>2</sub> O)] <sub>2</sub> {[Cu(en)] <sub>4</sub> [Cu(en) <sub>2</sub> ] <sub>5</sub> {[Cu(en) <sub>2</sub> KNb <sub>24</sub> O <sub>72</sub> H <sub>10</sub> ] <sub>2</sub> }·6en·70H <sub>2</sub> O                                              | 1.35 × 10 <sup>-3</sup>               | 358                | 98                       | S10              |
| [H <sub>2</sub> N(CH <sub>3</sub> ) <sub>2</sub> ] <sub>8</sub> {[Na(H <sub>2</sub> O) <sub>4</sub> ]NaAs <sub>2</sub> W <sub>22</sub> (CH <sub>3</sub> COO) <sub>2</sub> O <sub>76</sub> Rh <sub>2</sub> (N(CH <sub>3</sub> ) <sub>2</sub> ) <sub>2</sub> }·H <sub>2</sub> O | 3.23 × 10 <sup>-4</sup>               | 338                | 80                       | S11              |
| [Cu <sub>3</sub> (μ <sub>3</sub> -OH)(H <sub>2</sub> O) <sub>3</sub> (atz) <sub>3</sub> ][P <sub>2</sub> W <sub>18</sub> O <sub>62</sub> ]<br>·14H <sub>2</sub> O                                                                                                             | 4.42 × 10 <sup>-6</sup>               | 298                | 97                       | S12              |
| [H <sub>2</sub> en] <sub>4</sub> [Ni <sub>5</sub> (OH) <sub>3</sub> (trzS) <sub>3</sub> (en)(H <sub>2</sub> O)(B-α-PW <sub>9</sub> O <sub>34</sub> )]·6H <sub>2</sub> O                                                                                                       | 1.30 × 10 <sup>-5</sup>               | 358                | 98                       | S13              |
| Cu <sub>6</sub> (Trz) <sub>10</sub> (H <sub>2</sub> O) <sub>4</sub> [H <sub>2</sub> SiW <sub>12</sub> O <sub>40</sub> ]·8H <sub>2</sub> O                                                                                                                                     | 1.84 × 10 <sup>-6</sup>               | 368                | 95                       | S14              |
| [Cu(debqdc) <sub>2</sub> ] <sub>2</sub> [HPW <sub>12</sub> O <sub>40</sub> ]·4H <sub>2</sub> O                                                                                                                                                                                | 3.23 × 10 <sup>-4</sup>               | 373                | 98                       | S15              |
| Na <sub>2</sub> [Gd <sub>2</sub> (H <sub>2</sub> O) <sub>11</sub> ] <sub>2</sub> [Gd <sub>3</sub> (H <sub>2</sub> O) <sub>2</sub> -(α-SiW <sub>11</sub> O <sub>39</sub> ) <sub>2</sub> ]·69H <sub>2</sub> O                                                                   | 3.54 × 10 <sup>-3</sup>               | 358                | 98                       | S16              |
| [Ce <sup>III</sup> (H <sub>2</sub> O) <sub>6</sub> ]{[Ce <sup>IV</sup> <sub>7</sub> Ce <sup>III</sup> <sub>3</sub> O <sub>6</sub> (OH) <sub>6</sub> (CO <sub>3</sub> )(H <sub>2</sub> O) <sub>11</sub> ][P <sub>2</sub> W <sub>16</sub> O <sub>59</sub> ] <sub>3</sub> }      | 2.65 × 10 <sup>-4</sup>               | 373                | 75                       | S17              |
| Na <sub>5.5</sub> H <sub>6.5</sub> [(SbW <sub>9</sub> O <sub>33</sub> ) <sub>2</sub> {WO <sub>2</sub> (OH)} <sub>2</sub> {WO <sub>2</sub> }<br>RuC <sub>7</sub> H <sub>3</sub> NO <sub>4</sub> ]·36H <sub>2</sub> O                                                           | 2.97 × 10 <sup>-2</sup>               | 348                | 75                       | S18              |
| K <sub>7</sub> H <sub>29</sub> [As <sub>4</sub> W <sub>48</sub> O <sub>168</sub> ]·51H <sub>2</sub> O                                                                                                                                                                         | 5.0 × 10 <sup>-3</sup>                | 348                | 98                       | S19              |
| Cs <sub>11</sub> H <sub>11</sub> [As <sub>2</sub> W <sub>21</sub> O <sub>74</sub> (H <sub>2</sub> O) <sub>2</sub> ]·14H <sub>2</sub> O                                                                                                                                        | 6.4 × 10 <sup>-4</sup>                | 348                | 98                       |                  |
| Na <sub>16</sub> H <sub>22</sub> [(B-β-SbW <sub>9</sub> O <sub>33</sub> ) <sub>6</sub> (W <sub>3</sub> RuO <sub>7</sub> ) <sub>2</sub> (W <sub>4</sub> O <sub>11</sub> )]·118H <sub>2</sub> O                                                                                 | 5.41 × 10 <sup>-3</sup>               | 333                | 55                       | S20              |
| <b>[N(CH<sub>3</sub>)<sub>4</sub>]<sub>2</sub>K<sub>16</sub>Na<sub>10.5</sub>H<sub>10.5</sub>{[Zr(C<sub>2</sub>O<sub>4</sub>)<sub>2</sub>]<sub>3</sub>(P<br/>O<sub>4</sub>)(P<sub>6</sub>W<sub>39</sub>O<sub>150</sub>)]·45H<sub>2</sub>O</b>                                 | <b>1.18 × 10<sup>-2</sup></b>         | <b>368</b>         | <b>95</b>                | <b>This work</b> |

**Table S4.** Crystallographic data of the major product  $\text{K}_8[\text{Zr}(\text{C}_2\text{O}_4)_4]_2 \cdot 5\text{H}_2\text{O}$ .

|                                            |                                                               |
|--------------------------------------------|---------------------------------------------------------------|
| Empirical formula                          | $\text{C}_{16}\text{K}_8\text{O}_{37}\text{Zr}_2$             |
| Formula weight                             | 1279.40                                                       |
| Temperature / K                            | 296.3                                                         |
| Crystal system                             | tetragonal                                                    |
| Space group                                | $I4_1$                                                        |
| $a$ [Å]                                    | 28.2397(5)                                                    |
| $b$ [Å]                                    | 28.2397(5)                                                    |
| $c$ [Å]                                    | 11.6394(2)                                                    |
| $\alpha$ [Å]                               | 90                                                            |
| $\beta$ [Å]                                | 90                                                            |
| $\gamma$ [Å]                               | 90                                                            |
| $V$ [Å <sup>3</sup> ]                      | 9282.2(4)                                                     |
| $Z$                                        | 8                                                             |
| $\rho^{\text{calcd}}$ [g/cm <sup>3</sup> ] | 1.831                                                         |
| $\mu$ [mm <sup>-1</sup> ]                  | 1.269                                                         |
| $F(000)$                                   | 4992.0                                                        |
| Index ranges                               | $-34 \leq h \leq 34, -32 \leq k \leq 34, -14 \leq l \leq 13$  |
| Reflections collected                      | 26181                                                         |
| Independent reflections                    | 9011 [ $R_{\text{int}} = 0.0281, R_{\text{sigma}} = 0.0332$ ] |
| data/restraints/parameters                 | 9011/19/582                                                   |
| Goodness-of-fit on $F^2$                   | 1.035                                                         |
| $R1, wR2$ [ $I > 2\sigma(I)$ ]             | 0.0556, 0.1581                                                |
| $R1, wR2$ [all data]                       | 0.0612, 0.1656                                                |

## References

- [S1] G. M. Sheldrick, *Acta Crystallogr., Sect. A: Found. Crystallogr.*, 2008, **64**, 112–122.
- [S2] O. V. Dolomanov, L. J. Bourhis, R. J. Gildea, J. A. K. Howard, H. Puschmann, *Appl. J. Cryst.*, 2009, **42**, 339–341.
- [S3] R. Wan, Z. Liu, X. Ma, *Chem. Commun.*, 2021, **57**, 2172–2175.
- [S4] C. Granadeiro, R. Ferreira, P. Soares-Santos, L. Carlos, H. Nogueira, *Eur. J. Inorg. Chem.*, 2009, 5088–5095.
- [S5] J. Zhao, H. Li, Y. Li, C. Li, Z. Wang, L. Chen, *Cryst. Growth Des.*, 2014, **14**, 5495–5505.
- [S6] H. Li, Y. Liu, J. Liu, L. Chen, J. Zhao, G. Yang, *Chem. Eur. J.*, 2017, **23**, 2673–2689.
- [S7] S. Zhang, J. Zhao, P. Ma, J. Niu, J. Wang, *Chem. Asian J.*, 2012, **7**, 966–974.
- [S8] H. Zhao, J. Zhao, B. Yang, H. He, G. Yang, *Cryst. Growth Des.*, 2013, **15**, 5209.
- [S9] T. He, Y.-Z. Zhang, H. Wu, X.-J. Kong, X.-M. Liu, L.-H. Xie, Y. Dou, J.-R. Li, *Chem Phys Chem.*, 2017, **18**, 3245–3252.
- [S10] Z.-K. Zhu, L.-D. Lin, J. Zhang, X.-X. Li, Y.-Q. Sun, S.-T. Zheng, *Inorg. Chem. Front.*, 2020, **7**, 3919–3924.
- [S11] Z. Liu, X. Zhang, R. Wan, H. Li, Y. Hong, P. Ma, J. Niu, J. Wang, *Chem. Commun.*, 2021, **57**, 10250–10253.
- [S12] Y.-Q. Jiao, H.-Y. Zang, X.-L. Wang, E.-L. Zhou, B.-Q. Song, C.-G. Wang, K.-Z. Shao, Z.-M. Su, *Chem. Commun.*, 2015, **51**, 11313–11316.
- [S13] G.-J. Cao, J.-D. Liu, T.-T. Zhuang, X.-H. Cai, S.-T. Zheng, *Chem. Commun.*, 2015, **51**, 2048–2051.
- [S14] E.-L. Zhou, C. Qin, P. Huang, X.-L. Wang, W.-C. Chen, K.-Z. Shao, Z.-M. Su, *Chem. Eur. J.*, 2015, **21**, 11894–11898.
- [S15] J. Lai, X. Duan, H. Yang, M. Wei, *J. Coord. Chem.*, 2018, **71**, 1469–1483.
- [S16] J.-H. Liu, R.-T. Zhang, J. Zhang, D. Zhao, X.-X. Li, Y.-Q. Sun, S.-T. Zheng, *Inorg. Chem.*, 2019, **58**, 14734–14740.
- [S17] P. Ma, R. Wan, Y. Wang, F. Hu, D. Zhang, J. Niu, J. Wang, *Inorg. Chem.*, 2016, **55**, 918–924.
- [S18] M. Yang, H. Li, Y. Zhang, S. Ji, W. Chen, P. Ma, J. Wang, J. Niu, *Inorg. Chem.*, 2023, **62**, 6467–6473.
- [S19] H. Chen, K. Zheng, J. Wang, B. Niu, P. Ma, J. Wang, J. Niu, *Inorg. Chem.* 2023, **62**, 3338–3342
- [S20] Y. Sun, H. Li, Y. Zou, P. Ma, J. Niu, J. Wang, *Inorg. Chem.* 2023, **62**, 14142–14146
